# Supplementary material for: Humidity responsive self-healing based on intermolecular hydrogen bonding and metal–ligand coordination
Source: Royal Society of Chemistry journal article supplement (doi:10.1039/c6ra11418k), 2016-01-01
Supplement: c6ra11418k1.pdf [file c6ra11418k1.pdf]

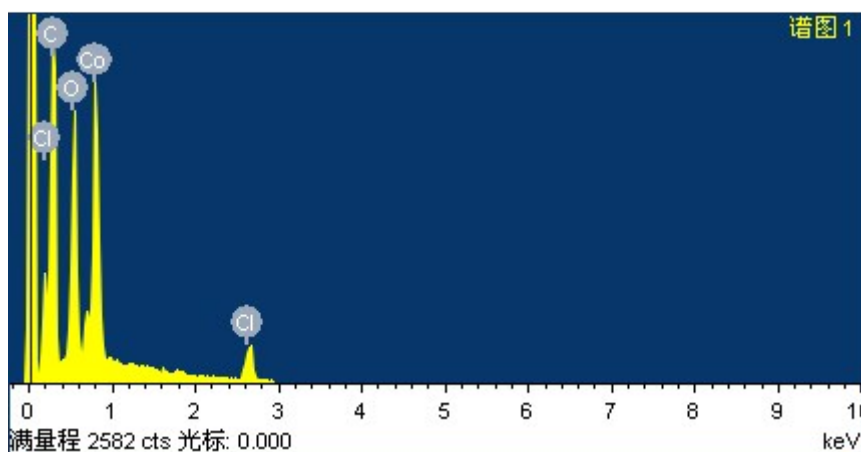

Figure s1 the EDS characterization of the Co-PAA/CS film.

Table s1 the composition of the Co-PAA/CS film.

| Element | Weight (%) | Atom (%) |
|---------|------------|----------|
| C K     | 24.67      | 50.14    |
| O K     | 14.03      | 21.41    |
| Cl K    | 11.13      | 7.66     |
| Co L    | 50.18      | 20.79    |
| Amounts | 100.00     |          |
